# Supplementary material
Source: publisher figshare collection journal article supplement (https://tandf.figshare.com/ndownloader/files/25898391)
Supplement: Supplementary file 1 [file 25898391]

| **Supplemental Table 1. Assessment of methodological quality of cohort studies using NOS** | | | | | | | | |
| --- | --- | --- | --- | --- | --- | --- | --- | --- |
| Author  [Year] | Haroutiunian (2009) | Herrero (2014) | Huang (2017) | Mink  (2011) | Spriet (2007) | Vélez Díaz- Pallarés (2011) | Wen  (2017) | Wu (2016) |
| Selection | | | | | | | | |
| Representativeness of the exposed cohort | * | * | * | * | * | * | * | * |
| Selection of the nonexposed cohort | * | * | * | * | * | * |  | * |
| Ascertainment of exposure | * | * | * | * | * | * | * | * |
| Outcome of interest was not present at the start of the study | * |  |  | * |  |  |  | * |
| Comparability | | | | | | | | |
| Comparability of cohorts |  |  |  |  |  |  |  |  |
| Outcome |  |  |  |  |  |  |  |  |
| Assessment of outcome | * | * | * | * | * | * | * | * |
| Was follow-up sufficiently long for outcomes to occur? | * | * | * | * | * | * | * | * |
| Adequacy of follow-up of cohorts |  |  | * |  |  |  | * | * |
| Total stars | 6 | 5 | 6 | 6 | 5 | 5 | 5 | 7 |
